# Supplementary material for: Vitrectomy with or without encircling band for pseudophakic retinal detachment: a multi-centre, three-arm, randomised clinical trial. VIPER Study Report No. 1—design and enrolment
Source: PubMed Central journal article supplement — Br J Ophthalmol. 2015 Jul 21;100(3):405–10. doi: 10.1136/bjophthalmol-2015-306732 (PMC4789721; doi:10.1136/bjophthalmol-2015-306732), 2015-07-21
Supplement: bjophthalmol-2015-306732-s3.pdf [file bjophthalmol-2015-306732-s3.pdf]

# VIPER-STUDIE

## Vitrektomie mit Cerclage oder Vitrektomie allein zur Behandlung der Pseudophakieamotio

Vitrectomy with encircling band or vitrectomy alone for the  
treatment of pseudophakic retinal detachment

Eine randomisierte multizentrische Studie

A randomised multicentre trial

## Patientenaufklärung zur Vorbereitung und Dokumentation des mündlichen Aufklärungsgesprächs durch den Arzt

**Koordinierender Prüfarzt der Studie:**

Univ.-Professor Dr. Peter Walter  
Direktor der Universitäts Augenklinik Aachen  
Pauwelsstr. 30  
52074 Aachen  
Tel.: 0241-8088191  
FAX: 02431-8082408  
e-mail: [pwalter@ukaachen.de](mailto:pwalter@ukaachen.de)

**Prüfarzt an Ihrem Prüfzentrum:**

(bitte für jedes Studienzentrum eintragen)

Univ.-Prof. Dr. Peter Walter  
Direktor der Universitäts-Augenklinik aachen  
s.o.)

Sehr geehrte Patientin, sehr geehrter Patient!

Bei Ihnen liegt eine Netzhautablösung vor. Es handelt sich dabei um eine Erkrankung, die nur operativ behandelt werden kann. Es handelt sich bei dieser Erkrankung um eine schwere Erkrankung, die unbehandelt zur Erblindung führt. Gleichzeitig wurde bei Ihnen bereits früher eine Operation am grauen Star durchgeführt. Es ist bei Ihnen eine Kunstlinse eingepflanzt worden.

Es gibt mehrere Möglichkeiten zur Behandlung der Netzhautablösung. Eine große klinische Studie hat ergeben, dass die Ergebnisse der operativen Glaskörperentfernung (Vitrektomie) in Ihrer Situation besser sind als nur eine Chirurgie mit eindellenden Elementen (Plombe, Cerclage). Das bedeutet, dass die operative Glaskörperentfernung häufiger zur Wiederanlegung der Netzhaut führt als die alleinige eindellende Buckelchirurgie.

Es ist aber derzeit unbekannt, ob die Kombination aus eindellender Chirurgie und Vitrektomie der alleinigen Vitrektomie überlegen ist oder nicht. Weiterhin ist derzeit nicht bekannt, ob eine neuere Technik der Vitrektomie, bei der die Instrumente direkt durch die Bindehaut in das Auge eingeführt werden, der herkömmlichen Technik gleichwertig ist.

Diese Fragen sollen in der VIPER Studie beantwortet werden. Da Sie die Kriterien zur Teilnahme an der Studie erfüllen, möchten wir Sie bitten, an dieser Studie teilzunehmen. Durch Ihre Teilnahme an der Studie würden Sie erheblich zum medizinischen Kenntniserwerb und Fortschritt beitragen ohne dass Nachteile für Sie entstehen.

Die VIPER Studie soll klären, welches das beste Verfahren zur Behandlung der Netzhautablösung nach Cataractoperation ist. Sie würden dazu beitragen, dass in Zukunft medizinische Verfahren besser und schonender für künftige Patienten eingesetzt werden können. Derzeit ist es dem Operateur und seiner Erfahrung überlassen, welches Verfahren er in Ihrer Situation einsetzt.

## **Welche Operationsverfahren werden in der Studie eingesetzt?**

1. Operative Glaskörperentfernung mit Legen eines den Augapfel umschnürenden Bandes (Cerclage).
2. Operative Glaskörperentfernung ohne Legen des Cerclagebandes.
3. Operative Glaskörperentfernung durch Bindehautzugänge, die in der Regel keinen Nahtverschluss benötigen.

## **Was ist bei allen Behandlungen gleich?**

In allen Fällen erfolgt eine operative Ausräumung des Glaskörpers. Dieses Verfahren hat sich in früheren Studien alten Techniken gegenüber als überlegen herausgestellt. Es erfolgt dann das Anlegen der Netzhaut mit einer Flüssigkeit, die schwerer als Wasser ist. Die auslösenden Netzhautlöcher werden mittels Laserbehandlung oder Kälteanwendung abgedichtet. Dann wird die schwere Flüssigkeit entfernt und gegen ein Luft/Gasgemisch ausgetauscht. Durch dieses Luft/Gasgemisch können Sie die ersten Tage nicht hindurch sehen.

## **Wodurch unterscheiden sich die Behandlungen?**

Das Legen des Cerclagebandes führt zu einer größeren Wundfläche. Patienten haben geringfügig stärkere Beschwerden nach der Operation. Da das Band unter den Augenmuskeln gelegt wird, kann es vor allem in den ersten Wochen nach der Operation zu Bewegungsstörungen des Augapfels kommen, was sich unter Umständen auch in Doppelbildern bemerkbar machen kann. Das Cerclageband führt zu einer Verlängerung des Augapfels, so dass die Brillenwerte nach der Operation angepasst werden müssen. Bei der dritten Methode wird die Bindehaut nicht eröffnet, d.h. es treten keine äußeren Wundflächen auf, was prinzipiell dazu führt, dass Patienten sehr wenig Schmerzen nach der Operation haben. In älteren Berichten gab es Hinweise auf eine erhöhte Entzündungsrate bei dieser Operationstechnik. Das hat sich aber in neueren Studien nicht bestätigen lassen.

## **Worin liegen die theoretischen Vor- und Nachteile des ein oder anderen Verfahrens?**

Es könnte möglich sein, dass das Legen des zusätzlichen Cerclagebandes die Operation sicherer macht und das Risiko für eine Wiederablösung der Netzhaut reduziert. Das Legen des Bandes ist aber Ursache für stärkere Nebenwirkungen der Operation. Wenn es sich herausstellt, dass das Legen des Cerclagebandes nicht zu einem besseren Erfolg führt, sondern nur mit stärkeren Nebenwirkungen einhergeht, würden wir in Zukunft das Band gar nicht mehr legen.

Der Einsatz der Vitrektomie durch Hülsensysteme mithilfe derer eine Eröffnung der Bindehaut nicht mehr nötig ist und die theoretisch auch ohne Naht der Zugänge erfolgen kann, ist wahrscheinlich mit geringeren postoperativen Beschwerden für den Patienten verbunden. Möglicherweise kann aber der Glaskörper nicht wie bei den anderen Techniken ähnlich vollständig entfernt werden, was einen gewissen Risikofaktor für das Auftreten einer Wiederablösung darstellt. Andererseits schützen die Hülsen aber wahrscheinlich vor dem Auftreten von Netzhautlöchern in dem Bereich, wo die Instrumenten eingeführt werden, was eventuell mit einem besseren Ergebnis einhergehen könnte.

## **Warum wird die Studie durchgeführt?**

Netzhautoperateure weltweit entscheiden zur Zeit alleine nach ihrer Erfahrung, welches Operationsverfahren sie in einer Situation, wie sie bei Ihnen vorliegt, einsetzen. Es gibt für jedes Verfahren theoretisch Vor- und Nachteile. Genau weiß man es aber nicht. Das Ergebnis dieser Studie wird eindeutig klären, welches Verfahren das Beste ist. Dabei geht es vor allem darum festzustellen, mit welchem Verfahren am sichersten eine Wiederanlage der Netzhaut erreicht werden kann.

## **Welchen Vorteil habe ich, wenn ich an der Studie teilnehme?**

Sie werden innerhalb der Studie sehr genau nachkontrolliert. Man kann davon ausgehen, dass wenn bei Ihnen Probleme im Heilungsverlauf nach der Operation auftreten, diese sofort

auffallen und Gegenmaßnahmen ergriffen werden können. Sie tragen mit Ihrer Teilnahme an der Studie erheblich zum medizinischen Fortschritt bei.

**Welche Maßnahmen erfolgen im Rahmen der Studie und welchen Belastungen bin ich dabei ausgesetzt?**

Einschlussuntersuchung:

| Maßnahme          | Belastung                                        | Zeitdauer  |
|-------------------|--------------------------------------------------|------------|
| Anamnese          | Keine                                            | 10 Minuten |
| Refraktion, Visus | Keine                                            | 10 Minuten |
| Augendruck        | Augentropfen                                     | 2 Minuten  |
| Spaltlampe        | Beleuchtung                                      | 5 Minuten  |
| Fundus            | Pupillenerweiterung,<br>Beleuchtung, Kontaktglas | 10 Minuten |

Operation (es wird eines dieser Verfahren durchgeführt)

| Maßnahme    | Belastung                       | Zeitdauer  |
|-------------|---------------------------------|------------|
| Operation 1 | Vitrektomie mit Cerclage        | 70 Minuten |
| Operation 2 | Vitrektomie ohne Cerclage       | 60 Minuten |
| Operation 3 | Vitrektomie mit<br>Hülsensystem | 60 Minuten |

Postoperative Untersuchungen nach 6, 12 und 26 Wochen:

| Maßnahme                             | Belastung                           | Zeitdauer  |
|--------------------------------------|-------------------------------------|------------|
| Anamnese                             | Keine                               | 10 Minuten |
| Refraktion, Visus                    | Keine                               | 10 Minuten |
| Augendruck                           | Augentropfen                        | 2 Minuten  |
| Spaltlampe                           | Beleuchtung                         | 5 Minuten  |
| Fundus                               | Pupillenerweiterung,<br>Beleuchtung | 10 Minuten |
| Fundusphotografie<br>(nur 26. Woche) | Pupillenerweiterung,<br>Beleuchtung | 15 Minuten |

## **Gibt es Risiken, mögliche Komplikationen, Beschwerden und Begleiterscheinungen?**

Jede Operation der Netzhautablösung hat ein typisches Risiko- und Nebenwirkungsprofil unabhängig davon, ob diese Verfahren in klinischen Studien angewendet werden oder nicht.

Nach der Operation wird das Auge etwas schmerzhaft sein, es wird ein Fremdkörpergefühl da sein, das Auge wird gerötet sein. In manchen Fällen kann die oberste Hornhautschicht (Hornhautepithel) aufgekrazt sein (<10 %). Diese Beschwerden werden mit Augentropfen und –salben oder mit schmerzstillenden Medikamenten aufgefangen werden.

Nach der Operation kann der Augendruck ansteigen (<20 %). Das wird der Augenarzt durch eine entsprechende Messung erkennen. In solchen Fällen kann der Augendruck durch Medikamente gesenkt werden.

Nach der Operation ist das Sehvermögen wegen der Gasfüllung zuerst sehr schlecht. Das Gas löst sich aber auf und dann wird die Sehschärfe schrittweise besser.

Eine Blutung im Auginneren kann auftreten (< 5 %). Solche Blutungen lösen sich in der Regel von alleine auf. Falls das nicht der Fall ist, kann man das Blut auch in einem operativen Eingriff wieder absaugen.

Entzündungen im Auge können ebenfalls auftreten. Sie sind extrem selten (< 1 %), erfordern aber einer medikamentöse in sehr seltenen Fällen auch eine operative Therapie. Solche Entzündungen können im Fall von Infektionen bis zur Erblindung des Auges und zum Verlust des Augapfels führen. Ein solches Ereignis ist extrem unwahrscheinlich (< 0,01 %) und tritt auch unabhängig vom Rahmen einer klinischen Studie auf.

Ziel der Operation ist die dauerhafte Wiederanlegung der Netzhaut. Man rechnet heute damit, dass in bis zu 15 % der Fälle eine Wiederablösung der Netzhaut auftritt. Ziel der Studie ist es herauszufinden, mit welchem Verfahren dieses Risiko am geringsten ist. Sollte es zu einer Wiederablösung der Netzhaut kommen, so sind weitere operative Maßnahmen erforderlich.

Wenn eine Cerclage gelegt wird, kann es in seltenen Fällen zu Bewegungsstörungen des Auges und zu Doppelbildern kommen (< 5 %). Darüberhinaus werden sich die Brillenwerte ändern.

## **Was ist bei Auftreten von Symptomen, Begleiterscheinungen oder unklaren Situationen zu tun?**

Treten solche Beschwerden während des stationären Aufenthaltes auf, so werden sie von unserem Personal erkannt und es können Gegenmaßnahmen eingeleitet werden. Nach der Phase des stationären Aufenthaltes nehmen Sie bitte Kontakt mit dem Studienzentrum auf, in dem Sie operiert worden sind.

## **Ist die Studie durch eine Ethikkommission überprüft worden?**

Die VIPER Studie ist von der Ethikkommission der Medizinischen Fakultät der RWTH Aachen geprüft worden. Es bestehen aus Sicht dieser Ethikkommission keine Bedenken, diese Studie durchzuführen. Sämtliche Studienzentren haben diese Genehmigung der für sie zuständigen Ethikkommissionen vorgelegt und auch von diesen Ethikkommissionen wurden keine Bedenken geäußert.

## **Bin ich versichert?**

Sie sind im Rahmen der Haftpflichtversicherung des Krankenhauses abgesichert. Die Haftpflichtversicherung des UK Aachen wurde bei der Zürich Versicherungs AG mit der Versicherungsschein Nr. 813.380.000.270 abgeschlossen. Für nähere Angaben wenden Sie sich bitte an den Geschäftsbereich Recht des Universitätsklinikums Aachen, Pauwelsstr. 30, 52074 Aachen, Tel.: 0241-8088010 oder 0241-8089717. Der Versicherungsschutz des Aachener Klinikums wird über die Ecclesia Mildenerger Hospital GmbH, Klingenbergstr. 4, 32758 Detmold verwaltet.

## **Können mir Nachteile aus der Teilnahme an der Studie entstehen oder gehe ich ein Risiko ein?**

Da im Rahmen der Studie nur etablierte Operationsverfahren eingesetzt werden und sie von erfahrenen Netzhautchirurgen operiert werden, entstehen Ihnen keine Nachteile. Da es sich



ja um eine Notfallsituation handelt, muss eine der drei Operationen sowieso durchgeführt werden. Der einzige Unterschied für Sie ist, dass das Los darüber entscheidet, welches Verfahren zum Einsatz kommt. Der Operateur beherrscht jedes der Verfahren gleichermaßen. Die Entscheidung per Los ist erforderlich, damit die mit den verschiedenen Verfahren operierten Patientengruppen miteinander vergleichbar sind. Es wird sichergestellt, dass Sie als Teilnehmer diese Studie zeitnah über neue Behandlungsverfahren oder neu aufgetretene Nebenwirkungen informiert werden.

### **Wann wird die klinische Studie vorzeitig beendet?**

Die Teilnahme an der Studie ist für Sie ganz und gar freiwillig. Sie können die Teilnahme an der Studie jederzeit und ohne Angabe von Gründen abbrechen.

Der Prüfarzt Ihres Studienzentrums wird Sie informieren, sollten aus dem Verlauf der Studie Gründe hervorgehen, die Studie abubrechen. Solche Gründe könnten sein, dass es bereits vor Ablauf der Studie deutlich wird, dass ein Verfahren dem anderen klar überlegen oder unterlegen ist. Sollte sich im Verlauf der Studie herausstellen, dass andere medizinische Fortschritte dazu führen, dass die eingesetzten Verfahren nicht mehr dem Stand der Wissenschaft entsprechen, wird der leitende Prüfarzt die Studie abbrechen und Sie hierüber informieren.

### **Wie werden die im Rahmen der Studie gesammelten Daten verwendet?**

Bei wissenschaftlichen Studien werden persönliche Daten und medizinische Befunde über Sie erhoben. Die Weitergabe, Speicherung und Auswertung dieser studienbezogenen Daten erfolgt nach gesetzlichen Bestimmungen ohne Namensnennung.

Die Daten, die im jeweiligen Prüfzentrum erhoben und archiviert werden, stehen dem Koordinierungszentrum für Klinische Studien an der Universität zu Köln zur Auswertung und Studienüberwachung zur Verfügung, der zuständigen Überwachungsbehörde (Bezirksregierung Köln) zur eventuellen Überprüfung der ordnungsgemäßen Durchführung der Studie. Autorisierte und zur Verschwiegenheit verpflichtete Beauftragte des

Koordinierungszentrum für klinische Studien der Universität Köln können in dem jeweiligen Studienzentrum Akteneinsicht nehmen.

### **Kostenerstattung**

Alle Maßnahmen im Rahmen der Studie sind notwendige Behandlungen und Untersuchungen, die von Ihrer Krankenversicherung gedeckt sind.

### **Wem kann ich weitere Fragen stellen?**

Für weitere Fragen im Zusammenhang mit der VIPER Studie steht Ihnen Ihr Prüfarzt im jeweiligen Zentrum jederzeit zur Verfügung.

Prüfarzt: \_\_\_\_\_

Zentrum: \_\_\_\_\_

Adresse: \_\_\_\_\_

Ort: \_\_\_\_\_

Telefon: \_\_\_\_\_

Oder wenden Sie sich an den Koordinierenden Leiter der Studie:

Univ.-Prof. Dr. Peter Walter

Direktor der Univ.-Augenklinik Aachen

Pauwelsstr. 30

52074 Aachen

Tel.: 0241-8088191

Die mündliche Aufklärung wurde durchgeführt von \_\_\_\_\_

---

Ort                      Datum                      Unterschrift

# Einwilligungserklärung

Zur Teilnahme an der klinischen Studie VIPER

Vitrektomie mit Cerclage oder Vitrektomie allein zur  
Behandlung der Pseudophakieamotio

Prüfarzt:

Name: \_\_\_\_\_

Anschrift: \_\_\_\_\_

\_\_\_\_\_

\_\_\_\_\_

Tel.: \_\_\_\_\_

FAX: \_\_\_\_\_

Name des Patienten: \_\_\_\_\_

Geburtsdatum: \_\_\_\_\_

Code: \_\_\_\_\_

### **Bereitschaft zur Teilnahme:**

Ich bin von \_\_\_\_\_ in einem persönlichen Gespräch ausführlich und verständlich über Wesen, Bedeutung und Tragweite der klinischen Studie sowie über mögliche Belastungen und Risiken aufgeklärt worden. Ich habe darüber hinaus den Text der Aufklärungsschrift erhalten, gelesen und verstanden. Meine Fragen wurden beantwortet. Ich hatte ausreichend Zeit, um die Entscheidung zur Studienteilnahme zu treffen.

Ich werde den ärztlichen Anordnungen, die für die Durchführung der klinischen Studie notwendig sind Folge leisten. Ich behalte mir das Recht vor, die Teilnahme an der Studie jederzeit zu beenden, ohne das mir dadurch Nachteile in der medizinischen Betreuung entstehen. Sofern ich unerwartete und ungewöhnliche Gesundheitsstörungen während dieser Studie bemerke, werde ich meinen Prüfarzt sofort kontaktieren. Für die Studiendauer werde ich den Prüfarzt über jede zusätzlich notwendige Behandlung, der ich mich unterziehen muss, informieren. Ich habe den Prüfarzt über bestehende Vorerkrankungen und über die Medikamente, die ich einnehmen muss informiert.

Ich werde über Erkenntnisse, die im Verlauf der Studie bekannt werden und die meine Teilnahme an der Studie beeinflussen könnten unmittelbar informiert.

Ich habe eine Kopie der Aufklärung und der Einverständniserklärung erhalten.

Ich habe verstanden, dass bei wissenschaftlichen Studien persönliche Daten und medizinische Befunde erhoben werden. Die Weitergabe, Speicherung und Auswertung dieser studienbezogenen Daten erfolgt nach gesetzlichen Bestimmungen und setzt vor Teilnahme an der Studie meine freiwillige Einwilligung voraus:

Patient:

Prüfarzt:

**Datenschutzerklärung:**

**Alle im Rahmen der Studie erhobenen Daten des Studienteilnehmers werden auch im Fall der Veröffentlichung der Studienergebnisse geheim gehalten.**

**Ich erkläre mich damit einverstanden, dass im Rahmen dieser Studie erhobene Daten/Krankheitsdaten auf Fragebögen und elektronische Datenträger aufgezeichnet und ohne Namensnennung weitergegeben werden an**

- a) das Koordinierungszentrum für klinische Studien der Universität zu Köln, Gleueler Str. 269, 50935 Köln, Tel.: 0221-47888121 zur wissenschaftlichen Auswertung;**
- b) die zuständige Überwachungsbehörde (Bezirksregierung) oder Bundesoberbehörde (Bundesinstitut für Arzneimittel und Medizinprodukte, Bonn) zur Überprüfung der ordnungsgemäßen Durchführung der Studie;**
- c) an den koordinierenden Leiter der Studie, Herrn Prof. Dr. Peter Walter, Univ.-Augenklinik Aachen, Pauwelsstr. 30, 52074 Aachen, Tel.: 0241-8088191 zur wissenschaftlichen Auswertung (verantwortlich für alle Aspekte der Datenverarbeitung).**

**Außerdem erkläre ich mich damit einverstanden, dass ein autorisierter und zur Verschwiegenheit verpflichteter Beauftragter des Koordinierungszentrums für klinische Studien, der zuständigen inländischen (und ausländischen) Überwachungsbehörde oder der zuständigen Bundesoberbehörde in meine beim Prüfarzt vorhandenen personenbezogenen Daten Einsicht nimmt, soweit dies für die Überprüfung der Studie notwendig ist. Für diese Maßnahme entbinde ich den Prüfarzt von der ärztlichen Schweigepflicht.**

**Ich habe verstanden, dass bei klinischen Studien Daten und medizinische Befunde erhoben werden, die in pseudonymisierter Form an Dritte weitergegeben werden. Empfänger dieser pseudonymisierten Daten sind das Koordinierungszentrum für klinische Studien der Universität Köln und der koordinierende Prüfarzt der Studie, Prof. Dr. Walter, Direktor der Univ.-Augenklinik Aachen. Unter Umständen kann die Bezirksregierung Köln als Überwachungsbehörde die Daten einsehen, um den ordnungsgemäßen Ablauf der Studie**

zu überprüfen. Die Pseudonymisierung erfolgt durch eine automatische Vergabe von Identifikationsnummern beim Einschluss des Teilnehmers in die Studie.

Ich erkläre mich damit einverstanden, dass im Rahmen der VIPER Studie von mir erhobene Daten vom Prüfarzt in pseudonymisierter Form an das Koordinierungszentrum für klinische Studien der Universität zu Köln weitergegeben werden und von autorisierten und zur Verschwiegenheit verpflichteten Mitarbeitern dieser Institution eingesehen werden können. Ich erkläre mich außerdem damit einverstanden, dass meine Daten in pseudonymisierter Form von der Bezirksregierung Köln als Überwachungsbehörde zum Zweck der Überprüfung des ordnungsgemäßen Ablaufs der Studie eingesehen werden können. Ich erkläre mich damit einverstanden, dass der koordinierende Leiter der Studie, Herr Univ.-Prof. Dr. Walter die Daten in pseudonymisierter Form einsehen kann.

Ich erkläre mich damit einverstanden, dass Beauftragte der Ethikkommission Einblick in die Originalakten nehmen dürfen.

Der Teilnehmer hat das Recht auf Auskunft und Berichtigung fehlerhaft gespeicherter Daten.

Wenn ich meine Einwilligung zur Teilnahme an der Studie widerrufe, werden meine Daten gelöscht.

Ich erkläre mich bereit an der Studie VIPER teilzunehmen.

**Patient:**

Nachname: \_\_\_\_\_ Vorname: \_\_\_\_\_

Geburtsdatum: \_\_\_\_\_

Unterschrift: \_\_\_\_\_ Datum & Ort: \_\_\_\_\_

**Prüfarzt:**

Nachname: \_\_\_\_\_ Vorname: \_\_\_\_\_

Unterschrift: \_\_\_\_\_ Datum & Ort: \_\_\_\_\_
